# Supplementary material
Source: MDPI journal article supplement (https://www.mdpi.com/2072-4292/8/9/775)
Supplement: s1 [file s1]

# Supplementary Materials: Long-Term Monitoring of the Flooding Regime and Hydroperiod of Doñana Marshes with Landsat Time Series (1974–2014). Remote Sensing 2016, 8, Article No. Manuscript ID

Ricardo Díaz-Delgado, David Aragonés, Isabel Afán and Javier Bustamante

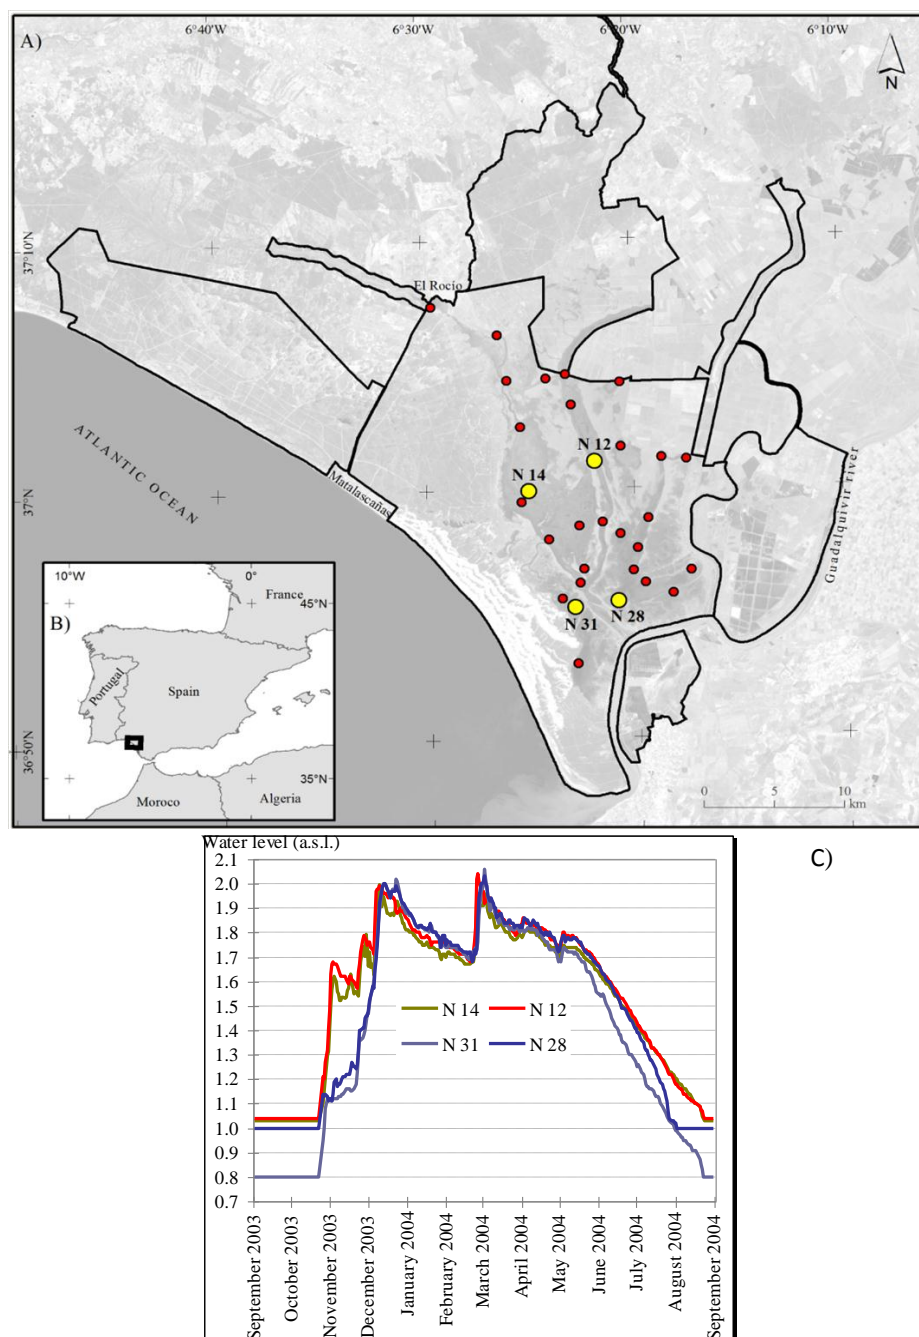

**Figure S1.** Location of limnimetric scales in Doñana marshes and water level readings. (A) Location of limnimetric scales in Doñana marshes (red dots). Yellow dots are the ones selected for the plot S2C. Black lines depict the limits of Doñana protected area; (B) Location of Doñana in Spain; (C) Water level readings above sea level (a.s.l.) during the 2003–2004 flooding cycle of the yellow dotted scales in figure S2A.

**Table S1.** Ground-truth data and used training scenes.

| Scene Date       | Sensor | Flooded | Non-Flooded | Total | Training Set | Testing Set |
|------------------|--------|---------|-------------|-------|--------------|-------------|
| 25 March 2004    | TM     | 89      | 23          | 112   | 90           | 22          |
| 11 February 2006 | TM     | 41      | 9           | 50    | 40           | 10          |
| 8 April 2006     | ETM+   | 40      | 10          | 50    | 40           | 10          |
| 2 May 2006       | TM     | 23      | 30          | 53    | 42           | 11          |
| 3 June 2006      | TM     | 77      | 45          | 122   | 98           | 24          |
| 10 November 2006 | TM     | 76      | 17          | 93    | 74           | 19          |
| 2 March 2007     | TM     | 102     | 36          | 138   | 110          | 28          |
| 18 March 2007    | TM     | 123     | 37          | 160   | 128          | 32          |
| <b>Total</b>     |        | 571     | 207         | 778   | 622          | 156         |

Note: Acquisition dates of the scenes used to compare the different classification techniques. The same subset was used to retrieve the classification tree thresholds and for the Jackknife inter-scene cross-validation approach which provided the optimal threshold. Flooded and Non-flooded columns refer to the number of sampling points collected in the field for every category during coincident field campaigns. Training and testing columns refer to the total number of points used for training and testing procedures in the validation assessment.

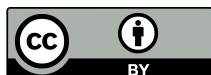

© 2016 by the authors; licensee MDPI, Basel, Switzerland. This article is an open access article distributed under the terms and conditions of the Creative Commons by Attribution (CC-BY) license (<http://creativecommons.org/licenses/by/4.0/>).
